# Supplementary material for: Clinical response and tolerability to abatacept in patients with rheumatoid arthritis previously treated with infliximab or abatacept: open-label extension of the ATTEST Study
Source: HighWire-hosted journal article supplement (doi:10.1136/annrheumdis-2011-200316), 2011-09-14
Supplement: annrheumdis-2011-200316_ds1.pdf [file annrheumdis-2011-200316_ds1.pdf]

Patients randomized and treated in the DB period, N=431

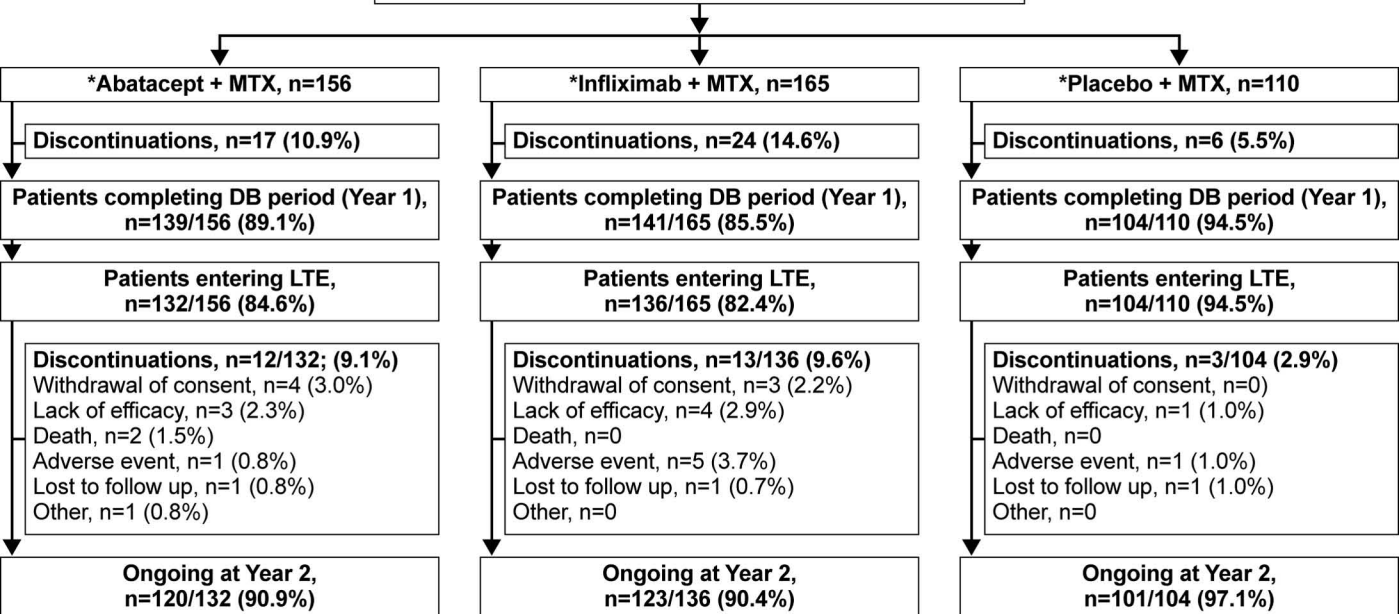

\*Represents original randomization groups: patients randomized to placebo and infliximab were switched to abatacept at Month 6 and Year 1, respectively
