# Supplementary material for: Clinical response and tolerability to abatacept in patients with rheumatoid arthritis previously treated with infliximab or abatacept: open-label extension of the ATTEST Study
Source: HighWire-hosted journal article supplement (doi:10.1136/annrheumdis-2011-200316), 2011-09-14
Supplement: annrheumdis-2011-200316_ds3.pdf [file annrheumdis-2011-200316_ds3.pdf]

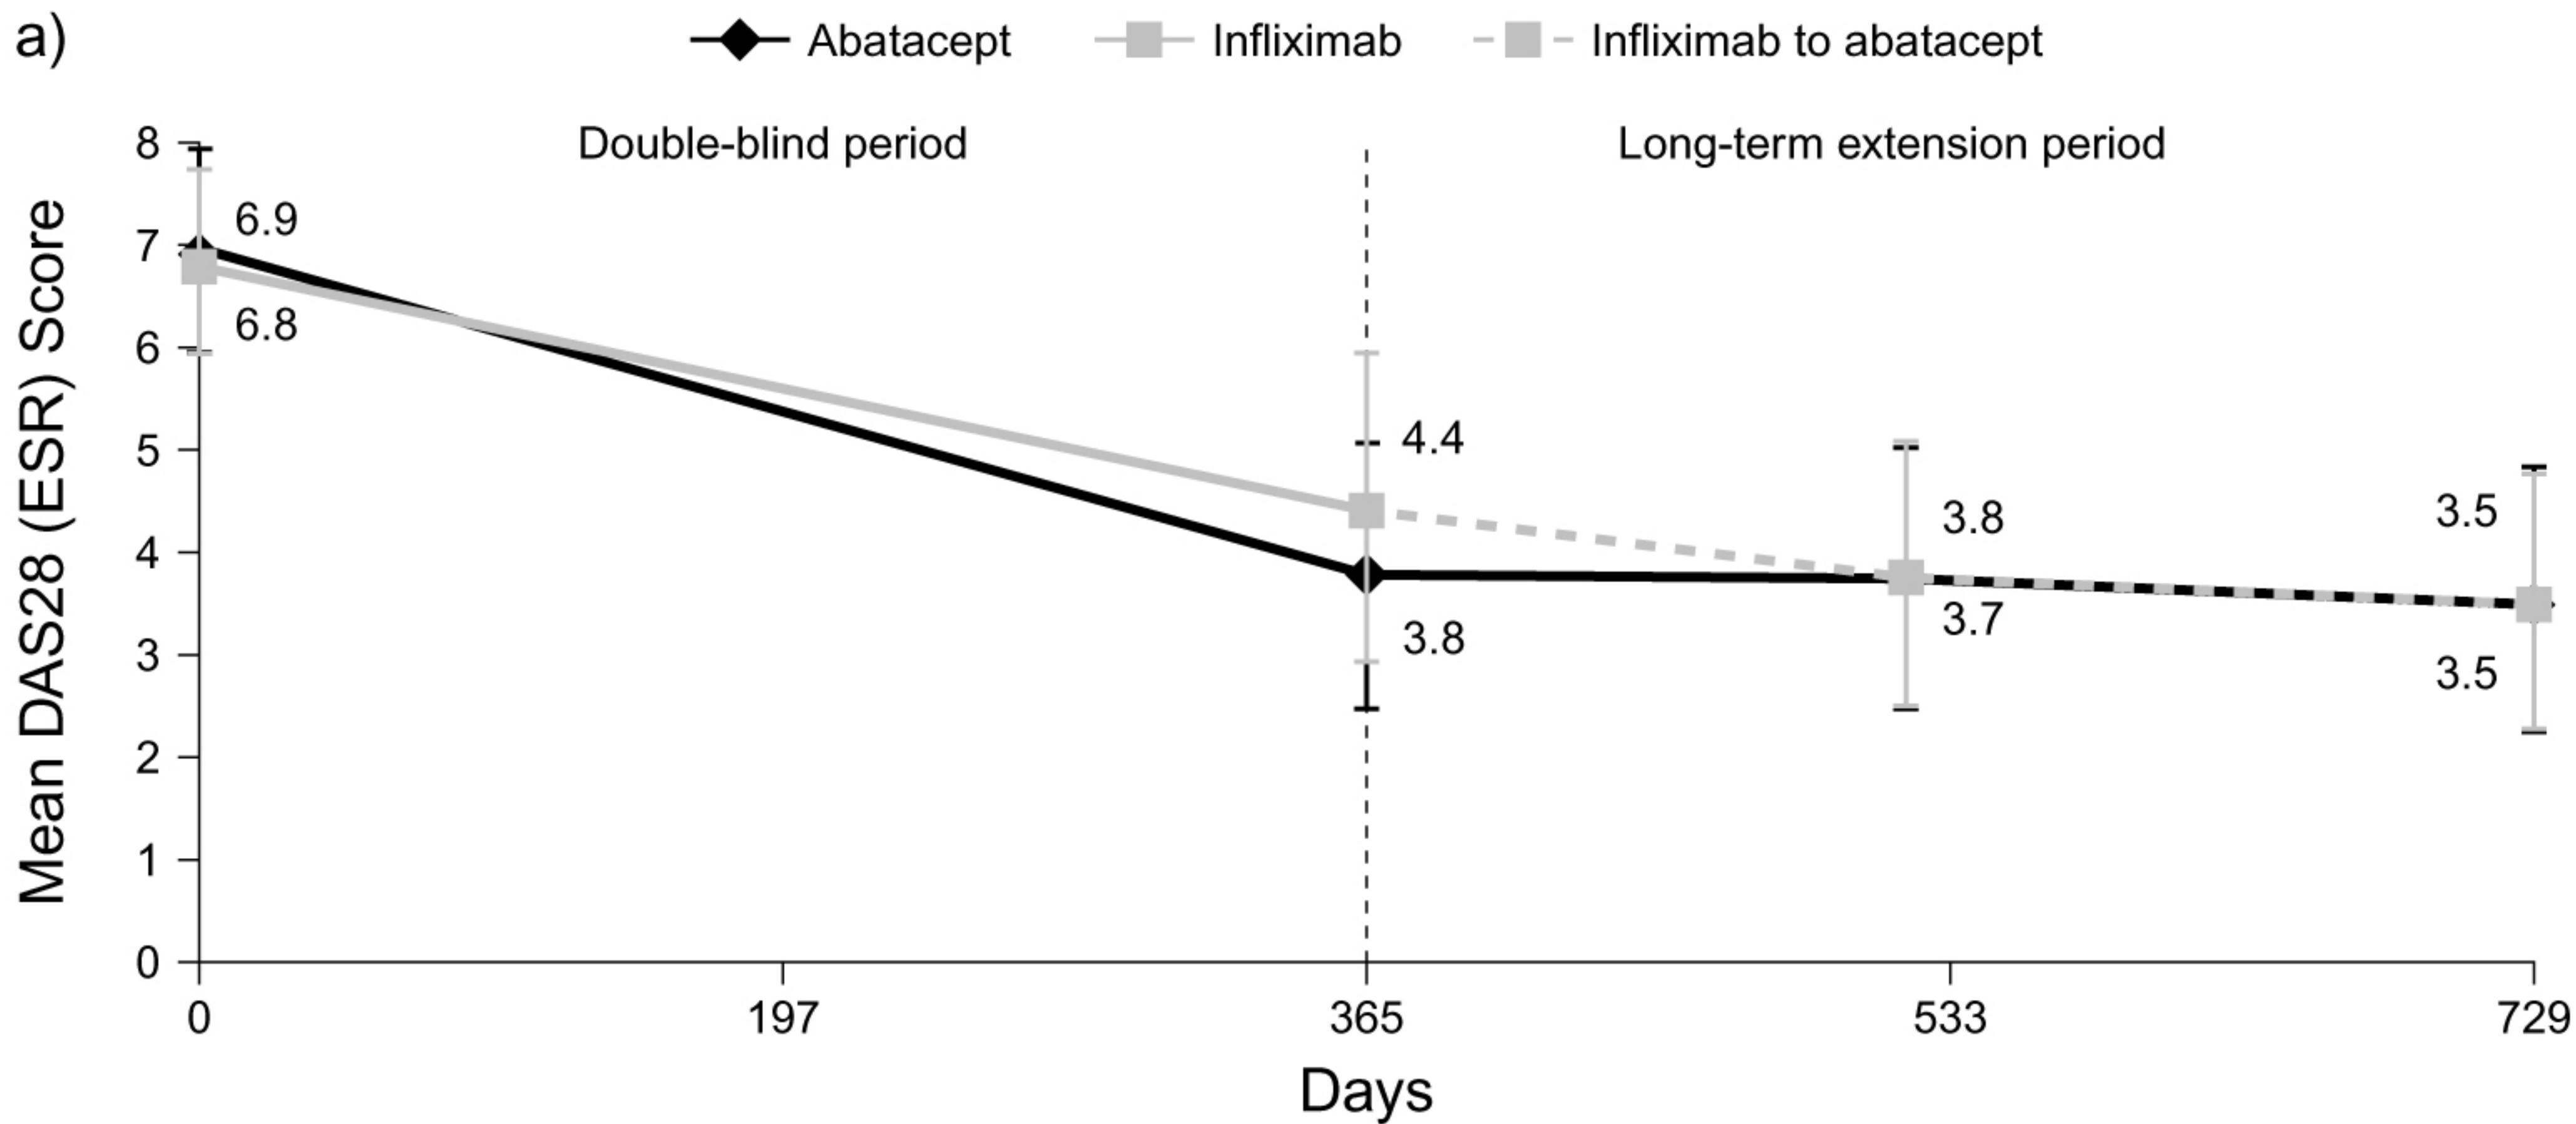

| Number of patients with available data at each visit |         |         |         |         |
|------------------------------------------------------|---------|---------|---------|---------|
| DB treatment group                                   | Day 197 | Day 365 | Day 533 | Day 729 |
| Abatacept                                            | 122     | 122     | 118     | 110     |
| Infliximab                                           | 130     | 130     | 121     | 121     |

b)

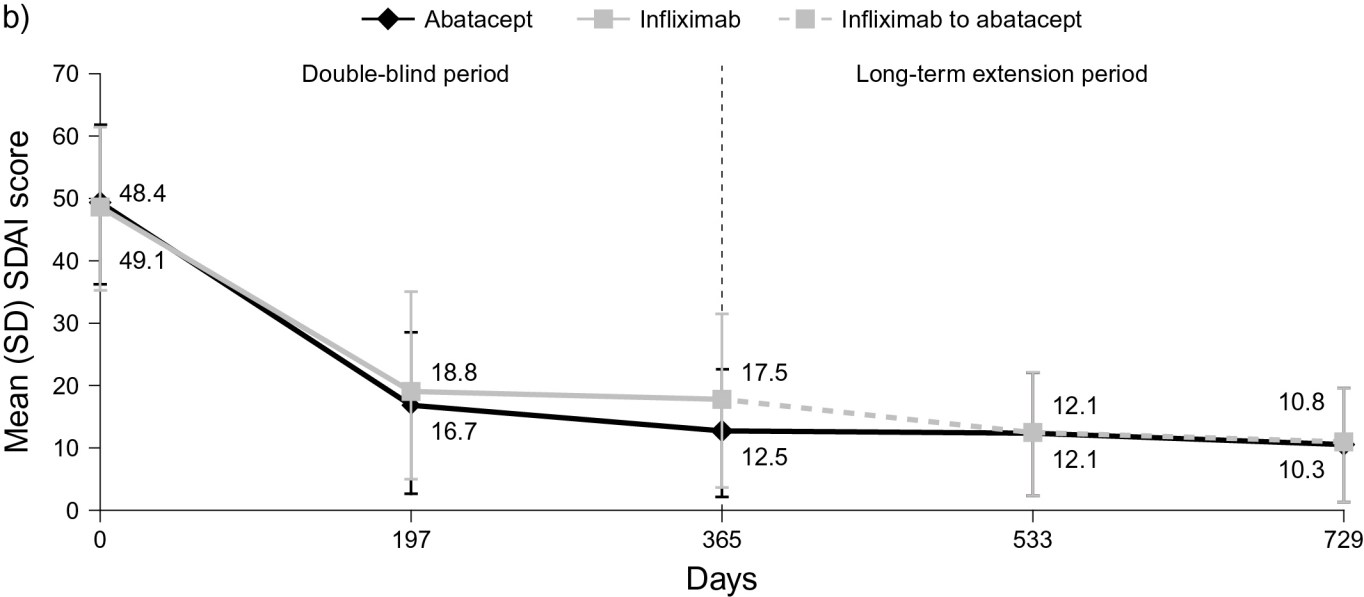

**Number of patients with available data at each visit**

| DB treatment group | Day 197 | Day 365 | Day 533 | Day 729 |
|--------------------|---------|---------|---------|---------|
| Abatacept          | 128     | 128     | 120     | 114     |
| Infiximab          | 131     | 135     | 125     | 126     |

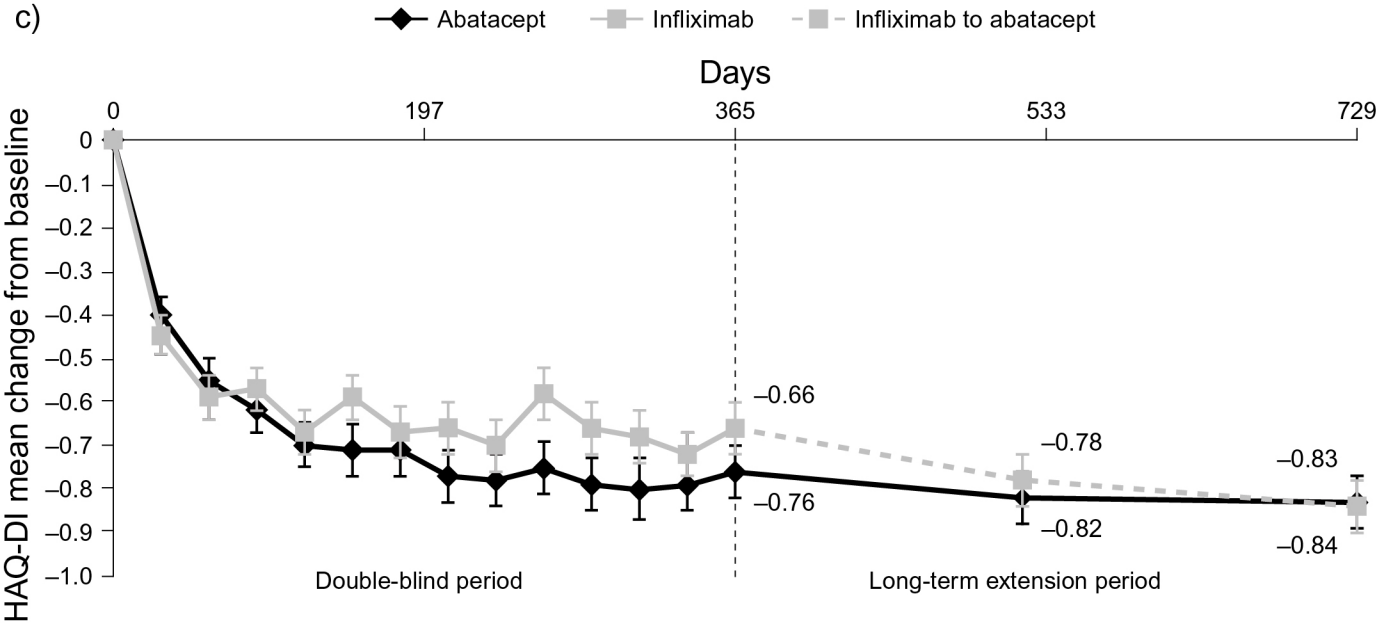

| Number of patients with available data at each visit |         |         |         |         |
|------------------------------------------------------|---------|---------|---------|---------|
| DB treatment group                                   | Day 197 | Day 365 | Day 533 | Day 729 |
| Abatacept                                            | 132     | 130     | 128     | 122     |
| Infliximab                                           | 136     | 136     | 127     | 127     |
